# Supplementary material
Source: PubMed Central journal article supplement (PMC4077989)

# Supplemental Figure 1

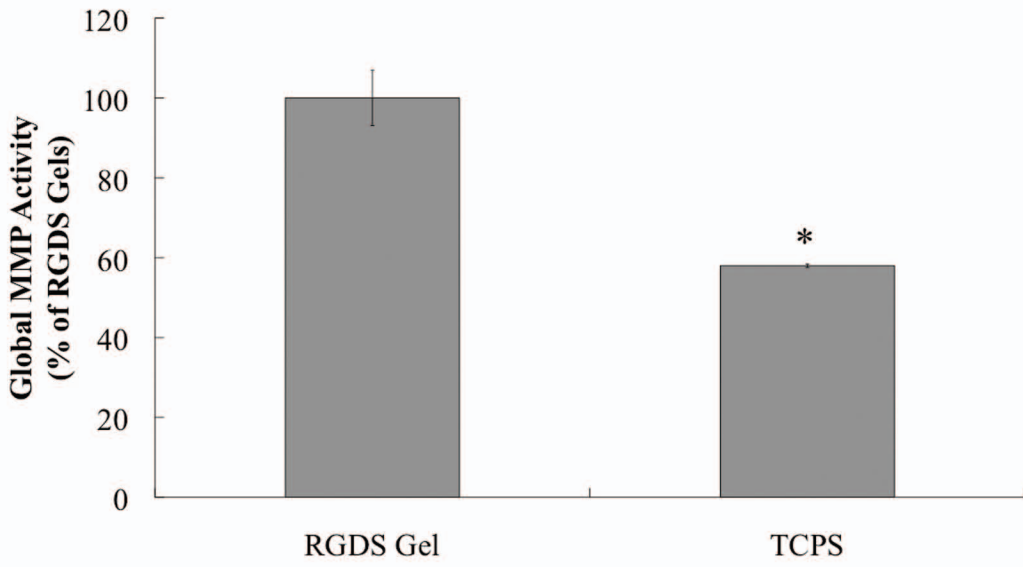

# Supplemental Figure 2

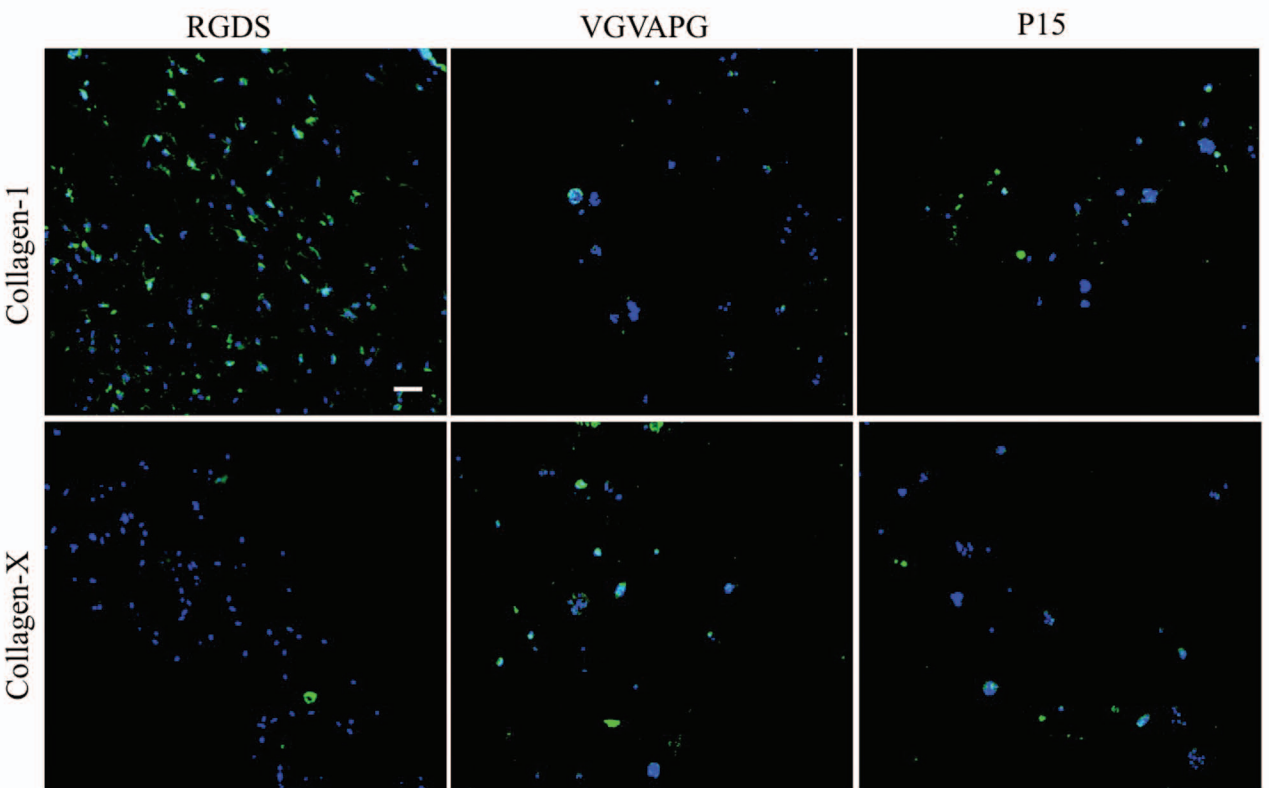

Supplement: NIHMS592370-supplement-Supp_FigureS1-S2.pdf [file NIHMS592370-supplement-Supp_FigureS1-S2.pdf]
